# Supplementary material for: The Effects of High-Intensity Power Training versus Traditional Resistance Training on Exercise Performance
Source: MDPI journal article supplement (doi:10.3390/ijerph19159400), 2022-07-31
Supplement: s1 [file s1]

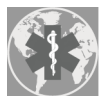

Supplementary Table S1. Shapiro-Wilk test of all variables.

| Assessments              | Group | Time | Shapiro-Wilk test |    |                |
|--------------------------|-------|------|-------------------|----|----------------|
|                          |       |      | Statistics        | df | p-value        |
| age (year)               | HIPT  | -    | 0.798             | 12 | <b>0.009 *</b> |
|                          | TRT   | -    | 0.942             | 9  | 0.605          |
| weight (cm)              | HIPT  | -    | 0.882             | 12 | 0.092          |
|                          | TRT   | -    | 0.735             | 9  | <b>0.004 *</b> |
| weight (kg)              | HIPT  | -    | 0.868             | 12 | 0.062          |
|                          | TRT   | -    | 0.987             | 9  | 0.991          |
| BMI (kg/m <sup>2</sup> ) | HIPT  | -    | 0.963             | 12 | 0.822          |
|                          | TRT   | -    | 0.959             | 9  | 0.793          |
| bench press (N)          | HIPT  | pre  | 0.963             | 12 | 0.832          |
|                          |       | post | 0.911             | 12 | 0.222          |
|                          | TRT   | pre  | 0.850             | 9  | 0.075          |
|                          |       | post | 0.802             | 9  | <b>0.022 *</b> |
| vertical jump (cm)       | HIPT  | pre  | 0.904             | 12 | 0.178          |
|                          |       | post | 0.894             | 12 | 0.132          |
|                          | TRT   | pre  | 0.982             | 9  | 0.974          |
|                          |       | post | 0.976             | 9  | 0.942          |
| peak power (W)           | HIPT  | pre  | 0.960             | 12 | 0.790          |
|                          |       | post | 0.891             | 12 | 0.120          |
|                          | TRT   | pre  | 0.871             | 9  | 0.126          |
|                          |       | post | 0.867             | 9  | 0.115          |
| mean power (W)           | HIPT  | pre  | 0.861             | 12 | 0.050          |
|                          |       | post | 0.851             | 12 | <b>0.038 *</b> |
|                          | TRT   | pre  | 0.925             | 9  | 0.437          |
|                          |       | post | 0.980             | 9  | 0.963          |
| peak power/kg<br>(W/kg)  | HIPT  | pre  | 0.880             | 12 | 0.088          |
|                          |       | post | 0.909             | 12 | 0.209          |
|                          | TRT   | pre  | 0.940             | 9  | 0.582          |
|                          |       | post | 0.985             | 9  | 0.984          |
| mean power/kg<br>(W/kg)  | HIPT  | pre  | 0.970             | 12 | 0.910          |
|                          |       | post | 0.957             | 12 | 0.739          |
|                          | TRT   | pre  | 0.802             | 9  | <b>0.021 *</b> |
|                          |       | post | 0.871             | 9  | 0.125          |

\* indicated significantly non-normal according to Shapiro-Wilk tests.
